# Supplementary material for: High electromagnetic wave absorption and flame retardancy performance from NF@HCS/NF-filled epoxy-based electronic packaging material
Source: Royal Society of Chemistry journal article supplement (doi:10.1039/d3ta06007a), 2023-11-28
Supplement: d3ta06007a1.pdf [file d3ta06007a1.pdf]

## Supporting Information

### High electromagnetic wave absorption and flame retardancy performance from NF@HCS/NF filled epoxy-based electronic packaging material

*Tianshun Xiong, Yubo Luo\*, Yongxin Qian, You Li, Junwei Li, Luyao Wang,  
Wenyuan Ma, Junyou Yang\**

State Key Laboratory of Material Processing and Die & Mould Technology, School  
of Materials Science and Engineering

Huazhong University of Science and Technology, Wuhan 430074, P. R. China.

Email: luoyubo@hust.edu.cn; jyyang@mail.hust.edu.cn

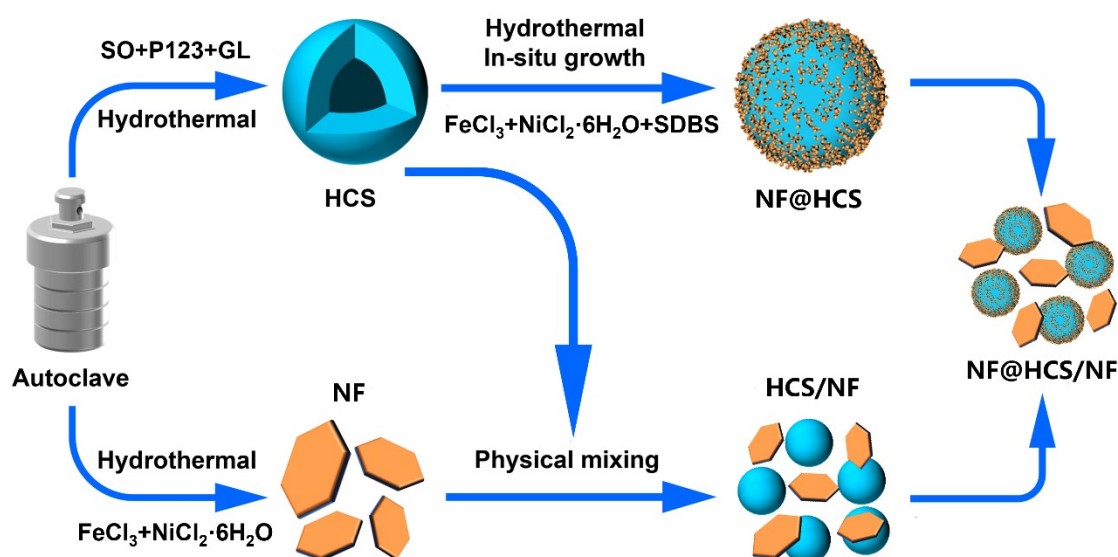

Fig. S1 The illustration of synthesis routes and relationships of HCS, NF, NF@HCS, HCS/NF, and NF@HCS/NF.

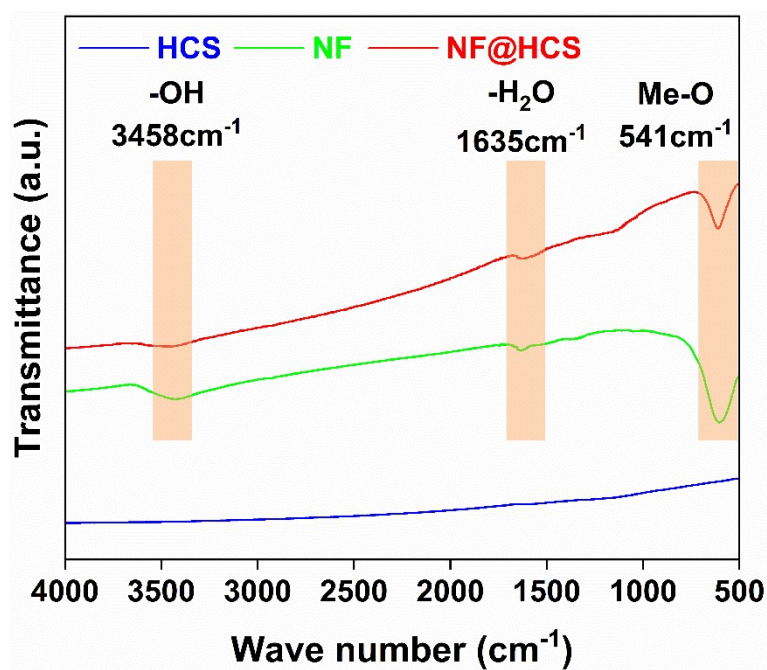

Fig. S2 The FT-IR spectroscopy of HCS, NF and NF@HCS. The Me-O vibration peaks around 541  $\text{cm}^{-1}$  show the existence of NF and successful combination of NF and HCS.

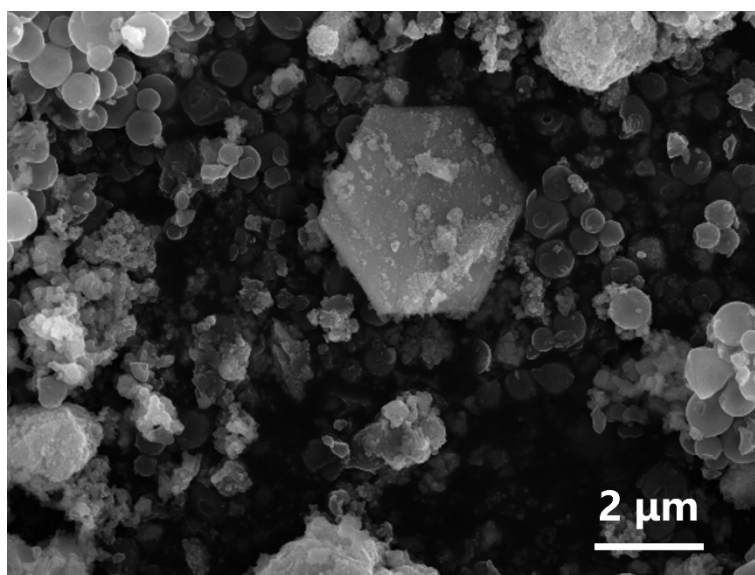

Fig. S3 The SEM image of NF@HCS/NF, showing the presence of HCS, microscale NF sheets, and nanoscale NF particles on HCS.

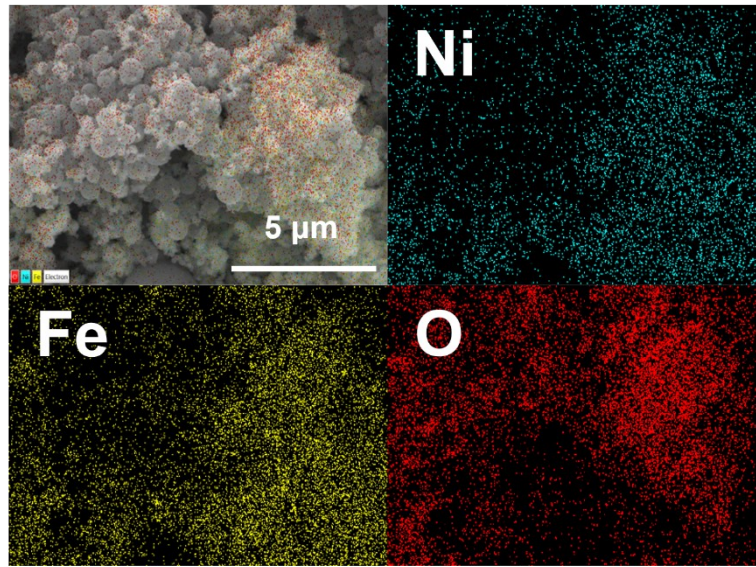

Fig. S4 The EDX mapping graphs of elemental distributions in NF@HCS powders, indicating the presence of Fe, Ni, and O elements.

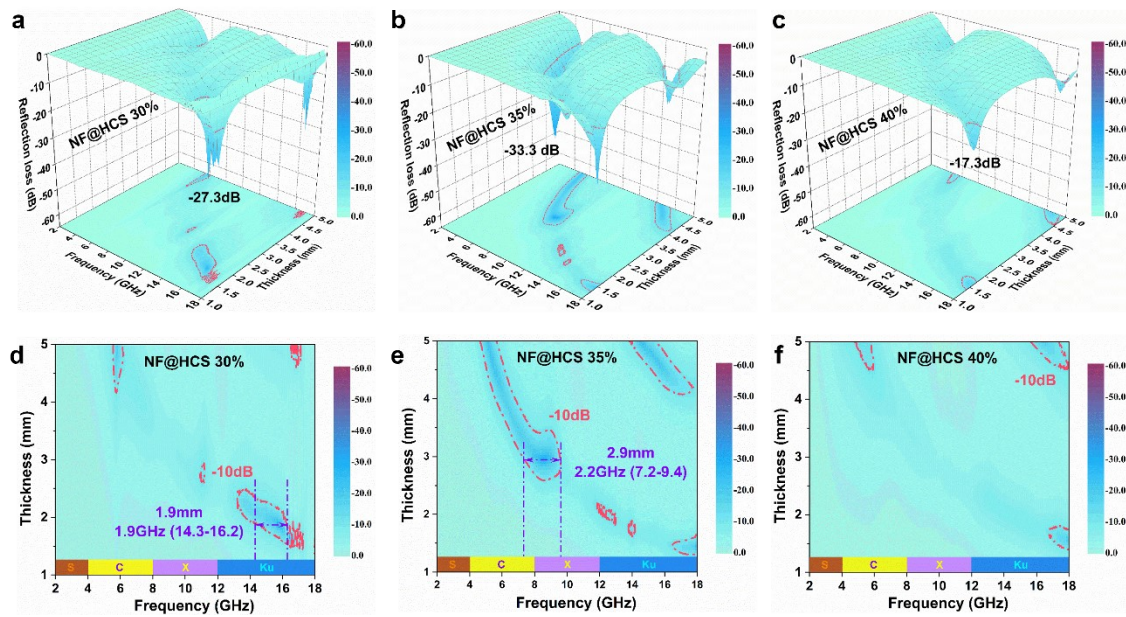

Fig. S5 The 3D RL diagrams and corresponding 2D RL mapping graphs of NF@HCS at different filling contents.

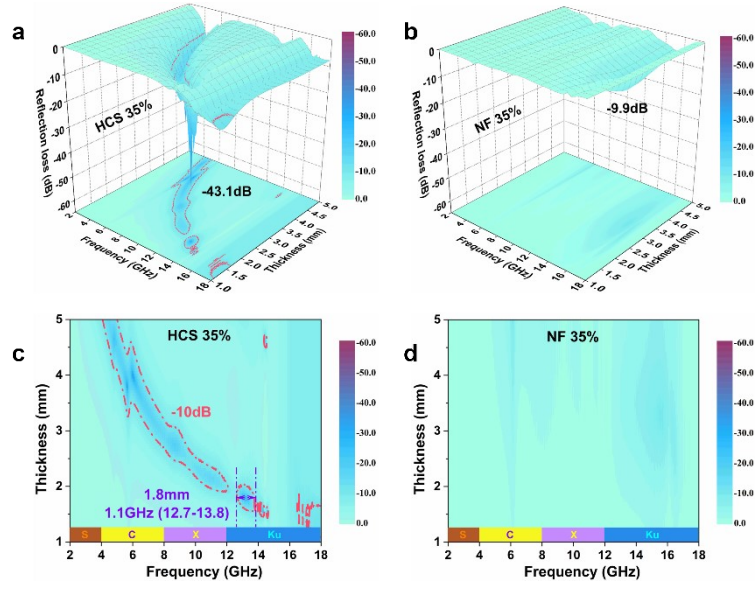

Fig. S6 The 3D RL diagrams and corresponding 2D RL mapping graphs of pure HCS and NF at filling contents of 35 wt%.

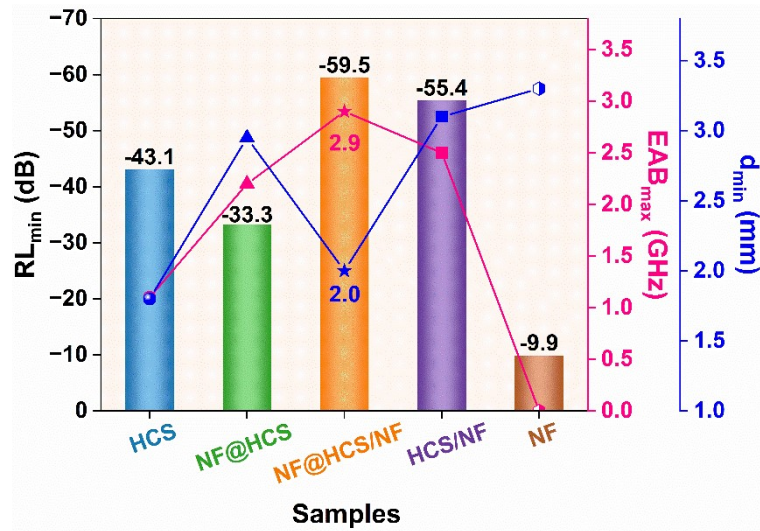

Fig. S7 The EMW absorption performance ( $RL_{min}$ ,  $EAB_{max}$ , and  $d_{min}$  values) summary graph of HCS, NF@HCS, NF@HCS/NF, HCS/NF, and NF.

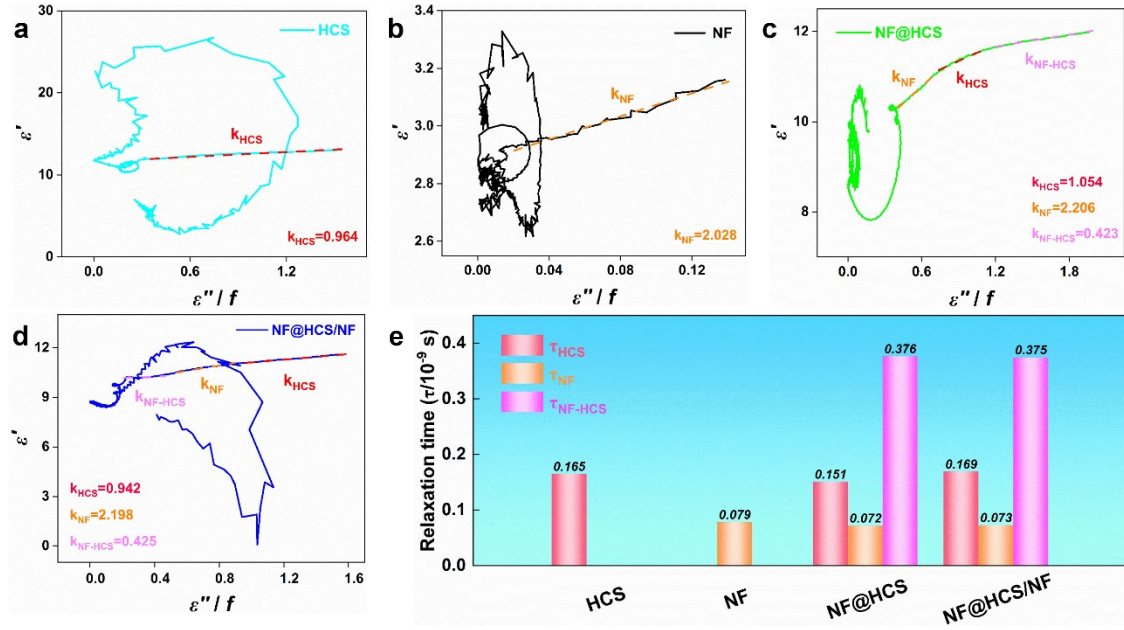

Fig. S8 (a-d) The relationship between  $\epsilon'$  and  $\epsilon''/f$  and (e) corresponding dielectric relaxation time of HCS, NF, NF@HCS and NF@HCS/NF.

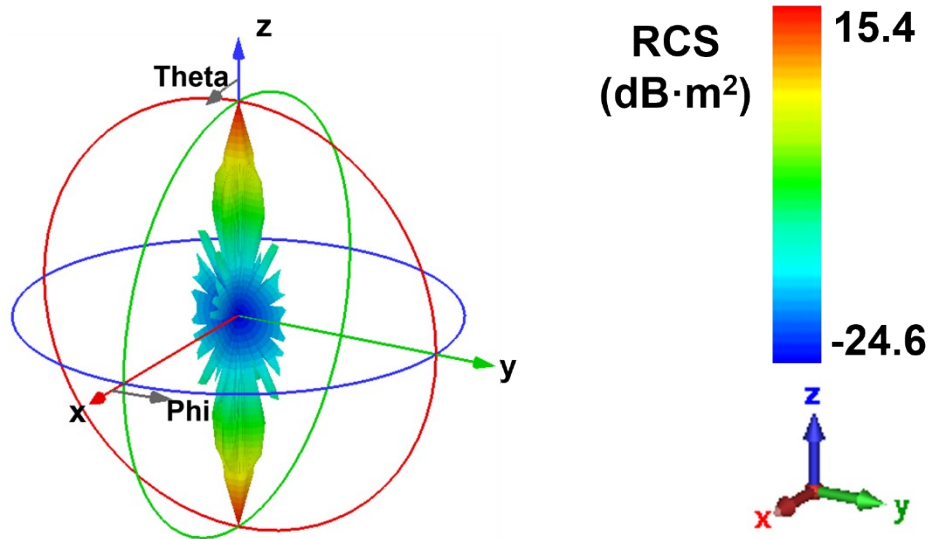

Fig. S9 CST 3D simulation plot of the perfect electric conductor (PEC) used here.

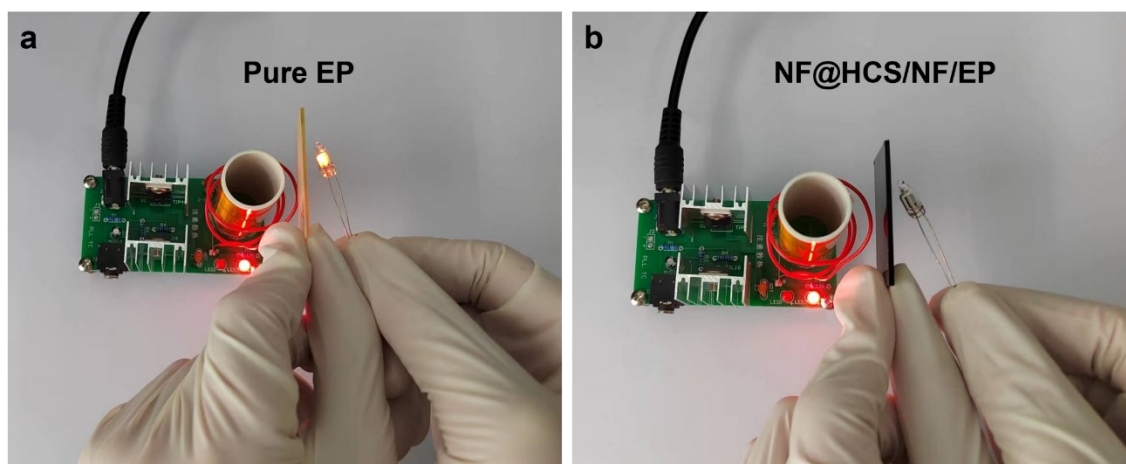

Fig. S10 The demonstration experiments via a Tesla coil showing the EMW absorption performance of (a) pure EP compared with (b) the as-prepared NF@HCS/NF/EP composite.

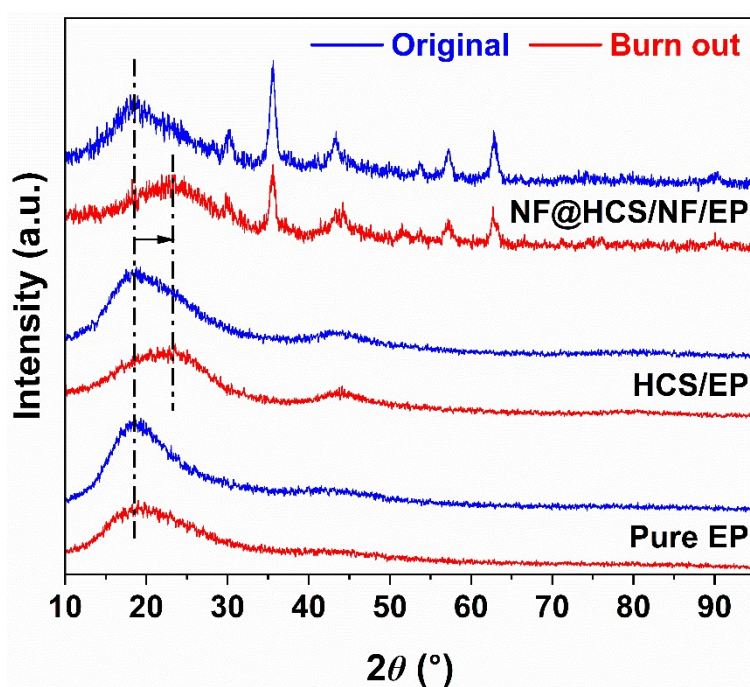

Fig. S11 The XRD patterns of pure EP, HCS/EP and NF@HCS/NF/EP before and after ignition. The red lines of burn-out samples show the phase and chemical stabilities of NF and HCS in the NF@HCS/NF/EP composites.

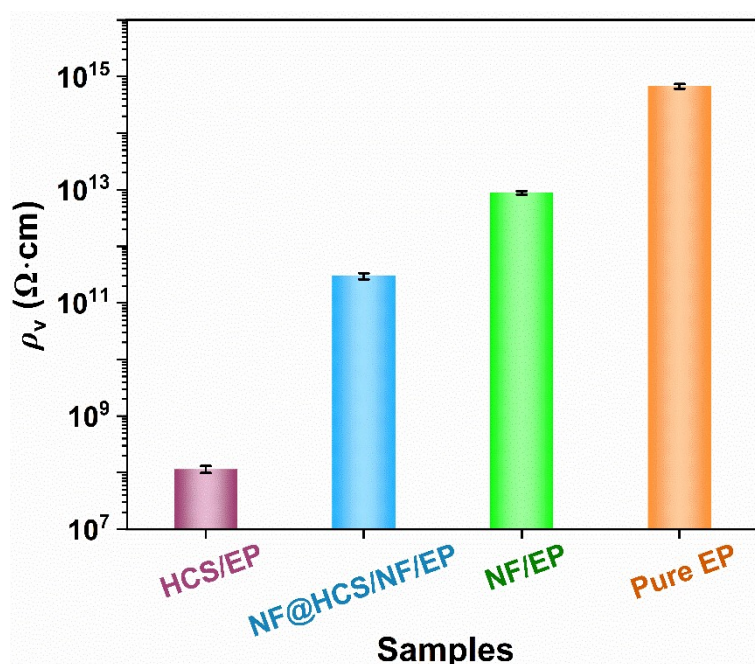

Fig. S12 The volumetric resistivity ( $\rho_v$ ) values of as-prepared composites.

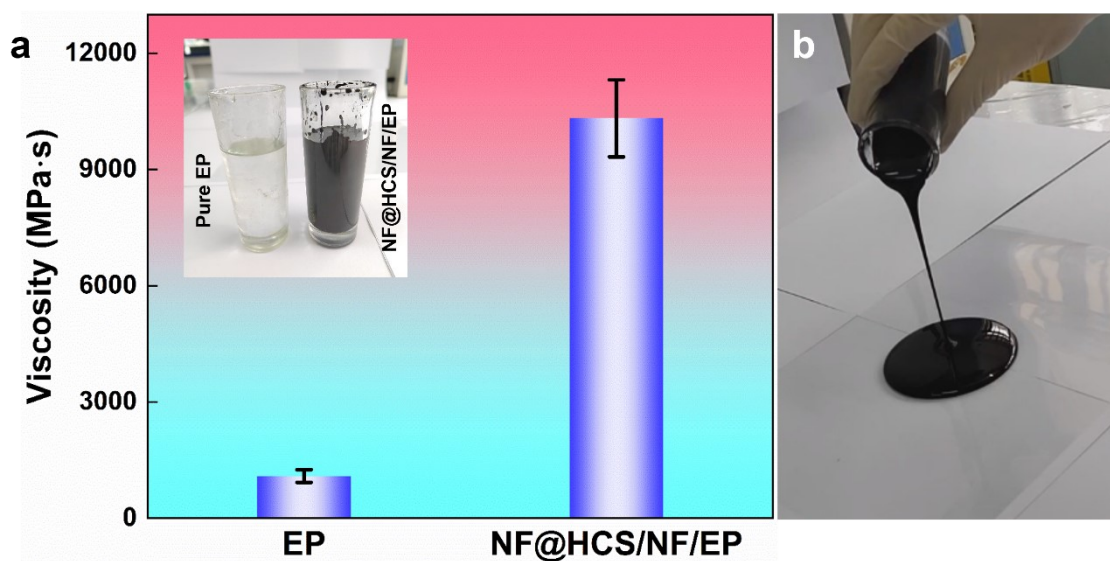

Fig. S13 (a) The viscosity of pure EP and NF@HCS/NF/EP systems, and the mass ratio of fillers is also 35% as above. Though the viscosity of NF@HCS/NF/EP (10322 MPa·s) is higher than pure EP (1088 MPa·s), the viscosity below 20000 MPa·s is still suitable for potting application. (b) The demonstration experiment showing good leveling performance of NF@HCS/NF/EP system.
